# Supplementary material
Source: Royal Society of Chemistry journal article supplement (doi:10.1039/d6cp00414h)
Supplement: d6cp00414h1.pdf [file d6cp00414h1.pdf]

## Supplementary Information

Aggregation behavior of sodium caprate under different pH, concentration, and intestinal fluid conditions: a coarse-grained molecular dynamics study comparing Martini 2 and Martini 3

### Authors:

Shahina Akter<sup>1,2</sup>, L. Magnus Bergström<sup>3</sup>, Per Hansson<sup>2,3</sup>, Shakhawath Hossain<sup>1,2\*</sup>, Per Larsson<sup>1,2\*</sup>

<sup>1</sup>Department of Pharmacy, Uppsala University, 751 23 Uppsala, Sweden

<sup>2</sup>The Swedish Drug Delivery Center (SweDeliver), Uppsala University, Uppsala 751 23, Sweden

<sup>3</sup>Department of Medicinal Chemistry, Uppsala University, 751 23 Uppsala, Sweden

\*Corresponding authors:

*Shakhawath Hossain,*

Address: Department of Pharmacy, Uppsala University, Uppsala 751 23, Sweden

Email: shakhawath.hossain@uu.se

*Per Larsson,*

Address: Department of Pharmacy, Uppsala University, Uppsala 751 23, Sweden

Email: per.r.larsson@uu.se

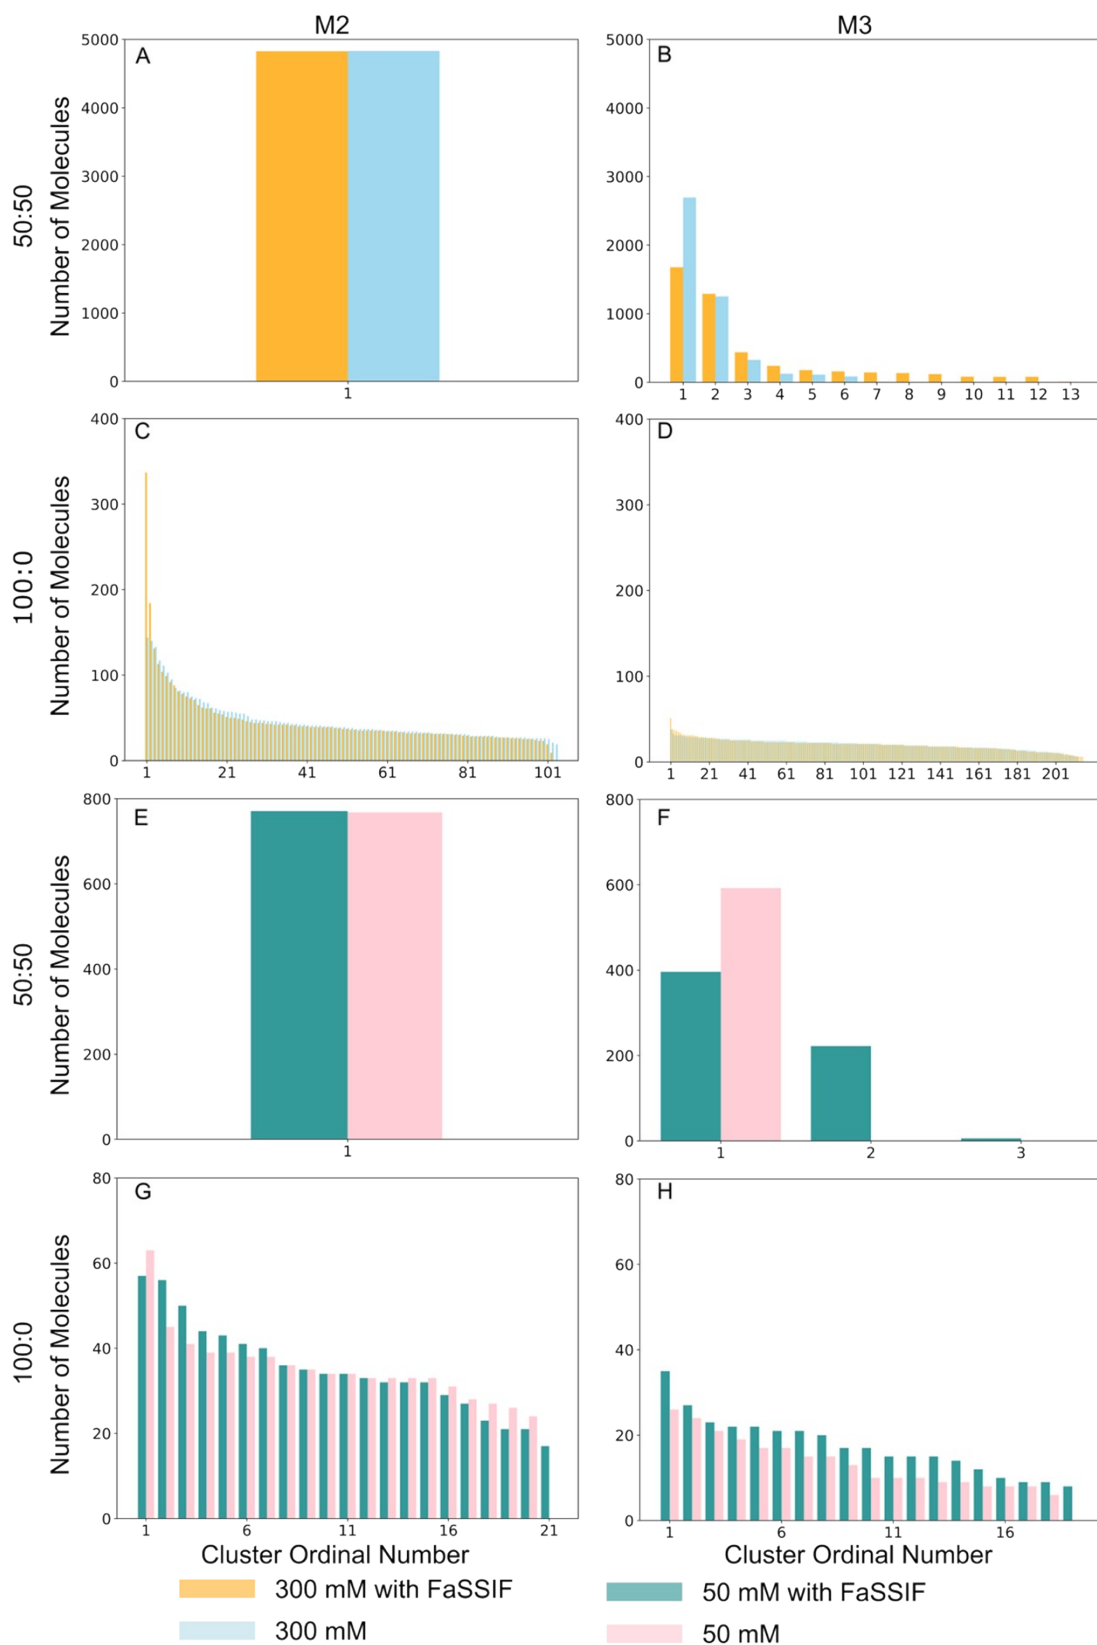

Supplementary Figure 1: The number of molecules in each cluster across all systems. (A) and (B) depict 300 mM C10 with charged-uncharged ratios of 50:50 for Martini 2 and Martini 3, respectively. (C) and (D) present 300 mM C10 with charged-uncharged ratios of 100:0 for

*Martini 2 and Martini 3. Similarly, (E) and (F) show 50 mM C10 with 50:50 charged-uncharged ratios for Martini 2 and Martini 3, respectively, while (G) and (H) display 50 mM C10 with 100:0 charged-uncharged ratios for Martini 2 and Martini 3, respectively.*
